# Supplementary material
Source: Springer Nature journal article supplement (https://www.springermedizin.de/resource/supplementary/12936_2012_2780_MOESM8_ESM.pdf/9544528)

albimanus 1  
arabiensis 2  
gambiae 3  
pseudopunctipennis 4

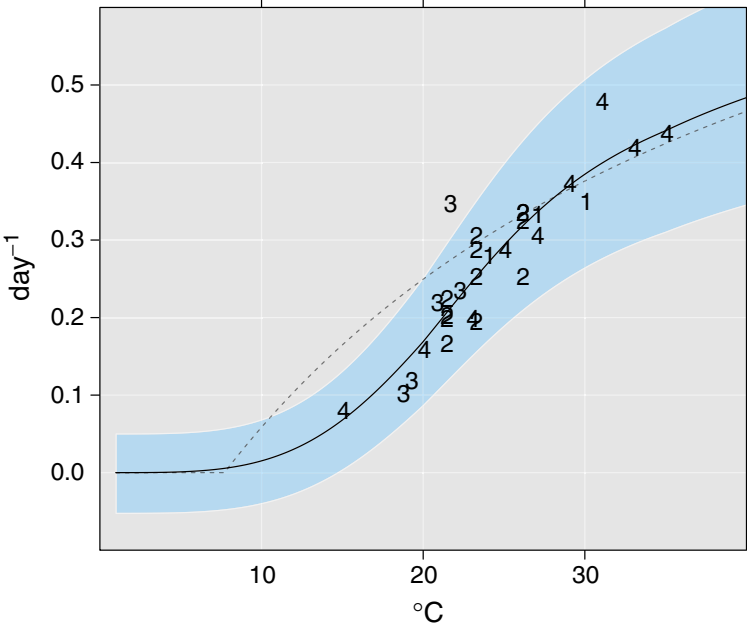

Supplement: MOESM8 [file 9544528]
